# Supplementary material for: The Chemical Composition of Scaptotrigona mexicana Honey and Propolis Collected in Two Locations: Similarities and Differences
Source: MDPI journal article supplement (doi:10.3390/foods12173317), 2023-09-03
Supplement: s1 [file s1]

Table S1. Chemical composition of the honey samples studied (in g/100 g)

|                                                | <i>Tuxtla Chico</i> |       |       |       |       |       |       |       |       |       |       |       |       |       |       |
|------------------------------------------------|---------------------|-------|-------|-------|-------|-------|-------|-------|-------|-------|-------|-------|-------|-------|-------|
|                                                | Mh1                 | Mh2   | Mh3   | Mh4   | Mh5   | Mh6   | Mh7   | Mh8   | Mh9   | Mh10  | Mh11  | Mh12  | min   | max   | avg.  |
| <b>G</b>                                       | 23.64               | 25.24 | 23.50 | 23.61 | 20.22 | 18.85 | 18.07 | 18.29 | 17.40 | 21.83 | 24.83 | 18.52 | 17.40 | 25.24 | 21.17 |
| <b>F</b>                                       | 27.60               | 30.57 | 28.99 | 29.27 | 28.93 | 27.74 | 27.27 | 27.74 | 26.81 | 29.29 | 29.73 | 28.16 | 26.81 | 30.57 | 28.51 |
| <b>Gb</b>                                      | 0.00                | 0.00  | 0.00  | 0.00  | 0.00  | 0.00  | 0.12  | 0.00  | 0.00  | 0.00  | 0.20  | 0.14  | 0.00  | 0.20  | 0.04  |
| <b>Su</b>                                      | 0.18                | 0.00  | 0.11  | 0.10  | 0.00  | 0.10  | 0.15  | 0.16  | 0.14  | 0.11  | 0.10  | 0.11  | 0.00  | 0.18  | 0.10  |
| <b>IMa</b>                                     | 0.69                | 0.57  | 0.73  | 0.74  | 0.68  | 0.55  | 0.68  | 0.66  | 0.57  | 0.63  | 0.84  | 0.49  | 0.49  | 0.84  | 0.65  |
| <b>IMu</b>                                     | 0.83                | 0.59  | 0.00  | 0.60  | 0.55  | 0.46  | 0.82  | 0.56  | 0.60  | 0.39  | 1.05  | 0.67  | 0.00  | 1.05  | 0.59  |
| <b>Kb</b>                                      | 1.98                | 1.75  | 2.05  | 1.83  | 2.48  | 2.56  | 2.61  | 2.74  | 2.57  | 2.40  | 1.52  | 2.88  | 1.52  | 2.88  | 2.28  |
| <b>Lu</b>                                      | 0.27                | 0.20  | 0.24  | 0.23  | 0.26  | 0.20  | 0.25  | 0.23  | 0.26  | 0.26  | 0.31  | 0.17  | 0.17  | 0.31  | 0.24  |
| <b>Ma</b>                                      | 1.17                | 1.34  | 1.64  | 1.23  | 2.00  | 2.03  | 1.97  | 2.51  | 2.12  | 1.94  | 1.11  | 2.37  | 1.11  | 2.51  | 1.79  |
| <b>Mu</b>                                      | 3.68                | 2.63  | 3.21  | 3.44  | 3.74  | 4.16  | 3.60  | 4.10  | 4.12  | 2.70  | 3.06  | 3.49  | 2.63  | 4.16  | 3.49  |
| <b>Ng</b>                                      | 0.83                | 1.01  | 0.93  | 0.83  | 1.22  | 1.16  | 1.05  | 0.94  | 1.07  | 1.32  | 0.72  | 1.16  | 0.72  | 1.32  | 1.02  |
| <b><math>\alpha</math>Tr</b>                   | 0.00                | 0.00  | 0.08  | 0.00  | 0.00  | 0.07  | 0.00  | 0.00  | 0.00  | 0.05  | 0.00  | 0.00  | 0.00  | 0.08  | 0.02  |
| <b><math>\alpha</math><math>\beta</math>Tr</b> | 0.42                | 0.33  | 0.39  | 0.40  | 0.36  | 0.46  | 0.40  | 0.44  | 0.42  | 0.31  | 0.34  | 0.34  | 0.31  | 0.46  | 0.38  |
| <b>Tru</b>                                     | 8.94                | 6.71  | 7.86  | 8.39  | 9.27  | 9.96  | 9.77  | 10.29 | 10.61 | 6.98  | 7.50  | 8.72  | 6.71  | 10.61 | 8.75  |
| <b>Tu</b>                                      | 2.43                | 2.15  | 2.57  | 2.38  | 3.18  | 3.61  | 3.24  | 3.81  | 3.68  | 2.49  | 1.95  | 3.29  | 1.95  | 3.81  | 2.90  |
| <b>Er</b>                                      | 0.32                | 0.19  | 0.27  | 0.24  | 0.23  | 0.95  | 1.19  | 0.52  | 0.80  | 0.73  | 0.15  | 0.84  | 0.15  | 1.19  | 0.54  |
| <b>1-Ks</b>                                    | 0.00                | 0.00  | 0.00  | 0.00  | 0.00  | 0.00  | 0.00  | 0.00  | 0.00  | 0.00  | 0.00  | 0.00  | 0.00  | 0.00  | 0.00  |
| <b>Mr</b>                                      | 0.31                | 0.27  | 0.39  | 0.25  | 0.45  | 0.56  | 0.34  | 0.32  | 0.43  | 0.36  | 0.00  | 0.45  | 0.00  | 0.56  | 0.34  |
| <b>Mz</b>                                      | 0.15                | 0.00  | 0.07  | 0.00  | 0.00  | 0.00  | 0.00  | 0.00  | 0.00  | 0.00  | 0.00  | 0.00  | 0.00  | 0.15  | 0.02  |
| <b>Pa</b>                                      | 0.24                | 0.23  | 0.33  | 0.33  | 0.39  | 0.52  | 0.39  | 0.39  | 0.50  | 0.29  | 0.14  | 0.42  | 0.14  | 0.52  | 0.35  |
| <b>mBd</b>                                     | 0.03                | 0.05  | 0.03  | 0.06  | 0.02  | 0.00  | 0.02  | 0.02  | 0.00  | 0.00  | 0.06  | 0.00  | 0.00  | 0.06  | 0.02  |
| <b>rBd</b>                                     | 0.04                | 0.02  | 0.02  | 0.01  | 0.01  | 0.00  | 0.01  | 0.00  | 0.00  | 0.00  | 0.03  | 0.00  | 0.00  | 0.04  | 0.01  |
| <b>Pro</b>                                     | 0.03                | 0.00  | 0.00  | 0.03  | 0.03  | 0.01  | 0.02  | 0.02  | 0.04  | 0.03  | 0.04  | 0.03  | 0.00  | 0.04  | 0.02  |
| <b>U1-16</b>                                   | 3.82                | 2.92  | 3.58  | 3.74  | 4.00  | 4.12  | 4.00  | 4.23  | 4.24  | 3.00  | 3.26  | 3.64  | 2.92  | 4.24  | 3.71  |

|              | <i>Cacahoatán</i> |       |       |       |       |       |       |       |       |       |       |       |       |       |       |
|--------------|-------------------|-------|-------|-------|-------|-------|-------|-------|-------|-------|-------|-------|-------|-------|-------|
|              | Mh13              | Mh14  | Mh15  | Mh16  | Mh17  | Mh18  | Mh19  | Mh20  | Mh21  | Mh22  | Mh23  | Mh24  | min   | max   | avg.  |
| <b>G</b>     | 14.58             | 19.16 | 18.56 | 16.40 | 17.85 | 17.47 | 16.84 | 20.04 | 17.13 | 16.31 | 18.67 | 16.78 | 14.58 | 20.04 | 17.48 |
| <b>F</b>     | 25.67             | 28.04 | 27.66 | 26.45 | 27.12 | 26.71 | 26.97 | 28.13 | 26.67 | 24.26 | 27.47 | 26.64 | 24.26 | 28.13 | 26.82 |
| <b>Gb</b>    | 0.10              | 0.17  | 0.00  | 0.04  | 0.00  | 0.11  | 0.12  | 0.16  | 0.06  | 0.07  | 0.00  | 0.00  | 0.00  | 0.17  | 0.07  |
| <b>Su</b>    | 0.18              | 0.00  | 0.08  | 0.09  | 0.22  | 0.14  | 0.08  | 0.10  | 0.13  | 0.21  | 0.10  | 0.16  | 0.00  | 0.22  | 0.12  |
| <b>IMa</b>   | 0.62              | 0.70  | 0.52  | 0.56  | 0.66  | 0.80  | 0.67  | 0.56  | 0.66  | 0.67  | 0.68  | 0.73  | 0.52  | 0.80  | 0.65  |
| <b>IMu</b>   | 0.72              | 0.80  | 0.93  | 0.73  | 0.45  | 0.55  | 0.61  | 0.41  | 0.74  | 0.64  | 0.57  | 0.67  | 0.41  | 0.93  | 0.65  |
| <b>Kb</b>    | 2.48              | 2.34  | 2.34  | 2.49  | 2.38  | 2.01  | 2.48  | 2.34  | 2.48  | 2.53  | 2.32  | 2.37  | 2.01  | 2.53  | 2.38  |
| <b>Lu</b>    | 0.30              | 0.20  | 0.28  | 0.24  | 0.26  | 0.31  | 0.27  | 0.18  | 0.25  | 0.30  | 0.32  | 0.24  | 0.18  | 0.32  | 0.26  |
| <b>Ma</b>    | 2.02              | 1.92  | 1.76  | 1.90  | 1.85  | 1.43  | 1.84  | 2.00  | 1.94  | 2.07  | 1.79  | 2.02  | 1.43  | 2.07  | 1.88  |
| <b>Mu</b>    | 5.24              | 4.12  | 4.59  | 4.97  | 4.34  | 4.93  | 4.92  | 3.50  | 4.04  | 4.80  | 4.16  | 4.35  | 3.50  | 5.24  | 4.50  |
| <b>Ng</b>    | 1.04              | 1.46  | 1.31  | 1.25  | 1.31  | 1.05  | 1.35  | 1.68  | 1.12  | 1.31  | 1.09  | 1.24  | 1.04  | 1.68  | 1.27  |
| <b>ααTr</b>  | 0.00              | 0.02  | 0.05  | 0.11  | 0.00  | 0.00  | 0.00  | 0.00  | 0.00  | 0.00  | 0.00  | 0.06  | 0.00  | 0.11  | 0.02  |
| <b>αβTr</b>  | 0.39              | 0.37  | 0.36  | 0.43  | 0.40  | 0.41  | 0.36  | 0.33  | 0.38  | 0.39  | 0.34  | 0.40  | 0.33  | 0.43  | 0.38  |
| <b>Tru</b>   | 12.65             | 9.42  | 10.26 | 11.82 | 10.46 | 11.38 | 11.05 | 8.49  | 10.63 | 11.86 | 9.89  | 11.04 | 8.49  | 12.65 | 10.74 |
| <b>Tu</b>    | 4.71              | 3.42  | 3.67  | 4.00  | 3.82  | 3.42  | 4.23  | 3.14  | 3.70  | 4.25  | 3.36  | 3.70  | 3.14  | 4.71  | 3.79  |
| <b>Er</b>    | 1.72              | 1.00  | 1.12  | 1.52  | 1.40  | 1.11  | 1.44  | 1.06  | 1.47  | 1.30  | 1.06  | 1.28  | 1.00  | 1.72  | 1.29  |
| <b>1-Ks</b>  | 0.00              | 0.00  | 0.00  | 0.00  | 0.00  | 0.00  | 0.00  | 0.00  | 0.00  | 0.00  | 0.00  | 0.00  | 0.00  | 0.00  | 0.00  |
| <b>Mr</b>    | 0.53              | 0.28  | 0.33  | 0.29  | 0.37  | 0.41  | 0.39  | 0.44  | 0.57  | 0.36  | 0.39  | 0.41  | 0.28  | 0.57  | 0.40  |
| <b>Mz</b>    | 0.09              | 0.05  | 0.06  | 0.00  | 0.07  | 0.09  | 0.00  | 0.07  | 0.06  | 0.00  | 0.00  | 0.04  | 0.00  | 0.09  | 0.04  |
| <b>Pa</b>    | 0.73              | 0.44  | 0.42  | 0.66  | 0.56  | 0.65  | 0.58  | 0.42  | 0.53  | 0.67  | 0.57  | 0.52  | 0.42  | 0.73  | 0.56  |
| <b>mBd</b>   | 0.00              | 0.00  | 0.00  | 0.00  | 0.00  | 0.00  | 0.00  | 0.01  | 0.00  | 0.03  | 0.01  | 0.01  | 0.00  | 0.03  | 0.01  |
| <b>rBd</b>   | 0.00              | 0.00  | 0.00  | 0.00  | 0.00  | 0.00  | 0.00  | 0.01  | 0.00  | 0.01  | 0.02  | 0.01  | 0.00  | 0.02  | 0.00  |
| <b>Pro</b>   | 0.03              | 0.02  | 0.03  | 0.03  | 0.04  | 0.03  | 0.02  | 0.02  | 0.03  | 0.03  | 0.05  | 0.03  | 0.02  | 0.05  | 0.03  |
| <b>U1-16</b> | 5.27              | 4.04  | 4.35  | 4.80  | 4.38  | 4.78  | 4.75  | 3.58  | 4.31  | 4.90  | 4.21  | 4.44  | 3.58  | 5.27  | 4.48  |

Acronyms: F—Fructose; G—Glucose; Gb—Gentiobiose; Su—Sucrose; Ima—Isomaltose; IMu—Isomaltulose; Kb—Kojibiose; Lu—Leucrose; Ma—Maltose; Mu—Maltulose; Ng—Nigerose; Tru—Trehalulose; Tu—Turanose; ααTr—αα-Trehalose; αβTr—αβ-Trehalose; Er—Erlase; 1-Ks—1-Kestose; Mr—Maltotriose; Mz—Melezitose; Pa—Panose; mBd—meso-2,3butanediol; rBd—racemic 2,3butanediol; Pro—Proline; U—Unknown.

Table S2. Total phenolic content of *Scaptotrigona mexicana* honey.

| Honey sample | TPC (mg GAE/100 g) |
|--------------|--------------------|
| Mh1          | 90.9±2.8           |
| Mh2          | 73.4±0.2           |
| Mh3          | 80.9±1.5           |
| Mh4          | 86.4±0.4           |
| Mh5          | 84.2±0.7           |
| Mh6          | 73.0±0.8           |
| Mh7          | 70.5±2.1           |
| Mh8          | 76.4±1.3           |
| Mh9          | 72.6±0.4           |
| Mh10         | 67.0±3.5           |
| Mh11         | 111.0±1.4          |
| Mh12         | 72.4±1.2           |
| Mh13         | 64.6±1.8           |
| Mh14         | 84.4±1.8           |
| Mh15         | 67.5±2.1           |
| Mh16         | 61.5±1.4           |
| Mh17         | 63.2±2.3           |
| Mh18         | 64.6±0.4           |
| Mh19         | 77.2±1.9           |
| Mh20         | 82.2±3.2           |
| Mh21         | 88.4±1.8           |
| Mh22         | 89.8±1.6           |
| Mh23         | 72.9±1.9           |
| Mh24         | 81.3±3.3           |

Table S3. Chemical composition of the investigated propolis samples (GC-MS after silylation; %TIC).

|                              | <i>Tuxtla Chico</i> |             |             |            |            |            |             |             |            |             |             |             |
|------------------------------|---------------------|-------------|-------------|------------|------------|------------|-------------|-------------|------------|-------------|-------------|-------------|
| <b>Compound</b>              | <b>Mp1</b>          | <b>Mp2</b>  | <b>Mp3</b>  | <b>Mp4</b> | <b>Mp5</b> | <b>Mp6</b> | <b>Mp7</b>  | <b>Mp8</b>  | <b>Mp9</b> | <b>Mp10</b> | <b>Mp11</b> | <b>Mp12</b> |
| <b><i>Sugar alcohols</i></b> | <b>2.9</b>          | <b>6.8</b>  | <b>2.0</b>  | <b>2.1</b> | <b>4.8</b> | <b>1.3</b> | <b>1.9</b>  | <b>0.5</b>  | <b>9.5</b> | <b>8.3</b>  | <b>1.3</b>  | <b>0.4</b>  |
| Glycerol                     | 1.9                 | 2.1         | 1.4         | 1.5        | 3.0        | 0.8        | 1.2         | 0.3         | 6.3        | 4.3         | 0.5         | 0.3         |
| Arabitol                     | 1.0                 | 4.3         | 0.6         | 0.5        | 1.2        | 0.5        | 0.7         | 0.2         | 2.6        | 2.7         | 0.8         | 0.1         |
| Pinitol                      | -                   | Tr.         | Tr.         | Tr.        | 0.4        | Tr.        | Tr.         | -           | 0.3        | 0.6         | Tr.         | -           |
| Mannitol                     | -                   | 0.4         | -           | 0.1        | 0.2        | Tr.        | Tr.         | -           | 0.3        | 0.7         | Tr.         | Tr.         |
| <b><i>Phenolic acids</i></b> | <b>0.3</b>          | <b>0.3</b>  | <b>Tr.</b>  | <b>0.3</b> | <b>0.2</b> | <b>Tr.</b> | <b>Tr.</b>  | <b>0.2</b>  | <b>1.1</b> | <b>1.5</b>  | <b>Tr.</b>  | <b>0.1</b>  |
| Hydroxybenzoic acid          | Tr.                 | 0.1         | Tr.         | 0.1        | Tr.        | Tr.        | Tr.         | 0.2         | 0.8        | 0.2         | Tr.         | Tr.         |
| Hydroxyphenyl acetic acid    | 0.3                 | Tr.         | Tr.         | 0.2        | 0.2        | Tr.        | Tr.         | Tr.         | 0.3        | 1.3         | Tr.         | 0.1         |
| <i>p</i> -Coumaric acid      | Tr.                 | 0.2         | -           | Tr.        | -          | -          | Tr.         | -           | -          | -           | -           | -           |
| Caffeic acid                 | -                   | Tr.         | -           | -          | -          | -          | -           | -           | -          | -           | -           | -           |
| <b><i>Diterpenes</i></b>     | <b>-</b>            | <b>-</b>    | <b>-</b>    | <b>-</b>   | <b>-</b>   | <b>-</b>   | <b>-</b>    | <b>-</b>    | <b>-</b>   | <b>-</b>    | <b>1.2</b>  | <b>-</b>    |
| Kaurenal                     | -                   | -           | -           | -          | -          | -          | -           | -           | -          | -           | -           | -           |
| Kaurenol                     | -                   | -           | -           | -          | -          | -          | -           | -           | -          | -           | -           | -           |
| Kaurenoic acid               | -                   | -           | -           | -          | -          | -          | -           | -           | -          | -           | 1.0         | -           |
| Hydroxukaurenoic acid        | -                   | -           | -           | -          | -          | -          | -           | -           | -          | -           | Tr.         | -           |
| Acetoxycarenoic acid         | -                   | -           | -           | -          | -          | -          | -           | -           | -          | -           | 0.2         | -           |
| <b><i>Cardanols</i></b>      | <b>1.3</b>          | <b>0.6</b>  | <b>1.4</b>  | <b>0.3</b> | <b>Tr.</b> | <b>Tr.</b> | <b>0.3</b>  | <b>0.2</b>  | <b>Tr.</b> | <b>Tr.</b>  | <b>0.4</b>  | <b>Tr.</b>  |
| Cardanol C17:2               | 0.4                 | 0.4         | 0.4         | 0.2        | Tr.        | Tr.        | 0.2         | 0.2         | Tr.        | Tr.         | 0.2         | Tr..        |
| Cardanol C17:1               | 0.1                 | 0.2         | 0.2         | 0.1        | Tr.        | Tr.        | 0.1         | Tr.         | Tr.        | Tr.         | 0.2         | Tr.         |
| Cardanol C19:1               | 0.8                 | Tr.         | 0.8         | Tr.        | -          | Tr.        | Tr.         |             | Tr.        | Tr.         | Tr.         | Tr.         |
| <b><i>Cardols</i></b>        | <b>19.3</b>         | <b>12.6</b> | <b>18.4</b> | <b>9.5</b> | <b>3.6</b> | <b>5.9</b> | <b>13.3</b> | <b>13.2</b> | <b>6.3</b> | <b>2.7</b>  | <b>14.2</b> | <b>2.9</b>  |
| Cardol C15:1                 | 0.6                 | 0.7         | 0.5         | 0.2        | Tr.        | 0.2        | 0.4         | 0.3         | 0.3        | 0.1         | 0.9         | 0.2         |
| Cardol C15:0                 | 1.4                 | 1.2         | 1.5         | 0.7        | 0.3        | 0.5        | 1.1         | 1.0         | 0.6        | 0.2         | 0.1         | Tr.         |

|                                                 |             |             |             |             |             |             |             |             |             |             |             |             |
|-------------------------------------------------|-------------|-------------|-------------|-------------|-------------|-------------|-------------|-------------|-------------|-------------|-------------|-------------|
| Cardol C17:2                                    | 7.0         | 5.0         | 8.4         | 3.6         | 1.1         | 1.9         | 5.4         | 5.1         | 2.0         | 0.8         | 5.0         | 0.8         |
| Cardol C17:1                                    | 1.3         | 0.7         | 1.1         | 0.6         | 0.2         | 0.5         | 1.1         | 0.9         | 0.5         | 0.2         | 0.7         | 0.2         |
| Cardol C17:1 (isomer)                           | 1.3         | 0.8         | 1.4         | 0.6         | 0.3         | 0.4         | 0.9         | 0.9         | 0.4         | 0.2         | 0.9         | 0.3         |
| Cardol C17:1 (isomer)                           | 4.5         | 2.7         | 4.8         | 2.5         | 0.9         | 1.3         | 3.9         | 3.3         | 1.7         | 0.8         | 3.7         | 0.8         |
| Cardol C17:0                                    | 0.2         | Tr.         | Tr.         | Tr.         | 0.2         | 0.3         | 0.2         | Tr.         | 0.1         | Tr.         | 0.3         | Tr.         |
| Cardol C19:1                                    | 3.0         | 1.5         | 0.4         | 1.3         | 0.6         | 0.8         | 0.3         | 1.7         | 0.7         | 0.4         | 2.6         | 0.6         |
| <b>Lignans</b>                                  | -           | -           | -           | -           | -           | -           | -           | -           | -           | -           | <b>0.8</b>  | -           |
| Dihydrocubebin                                  | -           | -           | -           | -           | -           | -           | -           | -           | -           | -           | 0.8         | -           |
| 3,4-Methylenedioxy<br>secoisolariciresinol      | -           | -           | -           | -           | -           | -           | -           | -           | -           | -           | -           | -           |
| <b>Anacardic acids</b>                          | <b>2.6</b>  | <b>4.0</b>  | <b>8.4</b>  | <b>3.1</b>  | <b>1.2</b>  | <b>1.7</b>  | <b>5.5</b>  | <b>5.1</b>  | <b>1.9</b>  | <b>1.0</b>  | <b>5.7</b>  | <b>1.4</b>  |
| Anacardic acid C15:0                            | 0.2         | 0.1         | 0.5         | 0.2         | Tr.         | 0.1         | 0.4         | 0.4         | 0.2         | Tr.         | 0.4         | Tr.         |
| Anacardic acid C15:2                            | 1.2         | 1.8         | 3.3         | 1.2         | 0.4         | 0.6         | 2.1         | 2.0         | 0.7         | 0.4         | 2.0         | 0.4         |
| Anacardic acid C15:1                            | 1.2         | 1.2         | 1.9         | 1.0         | 0.4         | 0.6         | 1.8         | 1.5         | 0.7         | 0.4         | 1.7         | 0.4         |
| Anacardic acid C17:1                            |             | 0.9         | 2.7         | 0.7         | 0.4         | 0.4         | 1.2         | 1.2         | 0.3         | 0.2         | 1.6         | 0.6         |
| <b>Triterpenes<br/>ursane/oleanane<br/>type</b> | <b>10.6</b> | <b>8.1</b>  | <b>11.9</b> | <b>19.0</b> | <b>13.1</b> | <b>20.8</b> | <b>12.0</b> | <b>17.9</b> | <b>12.4</b> | <b>12.7</b> | <b>10.8</b> | <b>14.7</b> |
| $\beta$ -Amyrenone                              | 0.8         | 0.1         | 0.3         | 1.4         | 0.7         | 2.1         | 1.0         | 1.0         | 1.4         | 1.4         | 0.1         | 1.6         |
| $\beta$ -Amyrin                                 | 4.1         | 3.0         | 3.6         | 4.4         | 2.9         | 3.7         | 3.2         | 4.7         | 3.6         | 2.3         | 3.3         | 2.7         |
| $\alpha$ -Amyrenone                             | 1.2         | 0.9         | 1.2         | 3.0         | 1.4         | 5.6         | 2.4         | 2.4         | 1.0         | 3.0         | 1.0         | 3.5         |
| $\alpha$ -Amyrin                                | 4.5         | 3.8         | 6.8         | 7.9         | 4.8         | 4.6         | 3.4         | 8.3         | 4.4         | 3.0         | 5.3         | 3.3         |
| Amyrin acetate                                  | -           | 0.3         | -           | 2.3         | 3.3         | 4.8         | 2.0         | 1.5         | 2.0         | 3.0         | 1.1         | 3.6         |
| <b>Triterpenes<br/>cycloartane type</b>         | <b>16.4</b> | <b>13.2</b> | <b>16.5</b> | <b>16.1</b> | <b>10.1</b> | <b>12.6</b> | <b>15.3</b> | <b>15.6</b> | <b>9.0</b>  | <b>8.7</b>  | <b>14.9</b> | <b>11.5</b> |
| Cycloartenol                                    | 7.5         | 5.7         | 5.4         | 8.2         | 6.1         | 7.6         | 5.4         | 6.2         | 5.7         | 4.9         | 5.4         | 6.1         |
| Mangiferolic acid                               | 1.7         | 1.6         | 2.2         | 2.0         | 1.3         | 1.6         | 2.5         | 2.4         | 0.7         | 1.3         | 2.5         | 2.2         |
| Isomaniferolic acid                             | 7.2         | 5.9         | 8.9         | 5.9         | 2.7         | 3.4         | 7.4         | 7.0         | 2.6         | 2.5         | 7.0         | 3.2         |
| <b>Others</b>                                   |             |             |             |             |             |             |             |             |             |             |             |             |
| Ethylamine                                      | 1.0         | 1.1         | 3.2         | 1.0         | 0.9         | 0.2         | 1.5         | 1.1         | 1.2         | 2.7         | 1.1         | 0.8         |

|                              | <i>Cacahoatán</i> |             |             |             |             |             |             |             |             |             |             |             |
|------------------------------|-------------------|-------------|-------------|-------------|-------------|-------------|-------------|-------------|-------------|-------------|-------------|-------------|
|                              | <b>Mp13</b>       | <b>Mp14</b> | <b>Mp15</b> | <b>Mp16</b> | <b>Mp17</b> | <b>Mp18</b> | <b>Mp19</b> | <b>Mp20</b> | <b>Mp21</b> | <b>Mp22</b> | <b>Mp23</b> | <b>Mp24</b> |
| <b><i>Sugar alcohols</i></b> | <b>1.1</b>        | <b>0.7</b>  | <b>0.6</b>  | <b>1.0</b>  | <b>0.8</b>  | <b>0.6</b>  | <b>2.1</b>  | <b>1.7</b>  | <b>1.5</b>  | <b>3.1</b>  | <b>5.6</b>  | <b>1.2</b>  |
| Glycerol                     | 0.7               | 0.5         | 0.3         | 0.7         | 0.5         | 0.4         | 1.4         | 1.0         | 0.8         | 1.7         | 1.5         | 1.0         |
| Arabitol                     | 0.4               | 0.2         | 0.3         | 0.3         | 0.3         | 0.2         | 0.6         | 0.7         | 0.7         | 1.3         | 1.1         | 0.2         |
| Pinitol                      | -                 | -           | -           | -           | -           | -           | 0.1         | -           | -           | 0.1         | Tr.         | -           |
| <b><i>Phenolic acids</i></b> | <b>0</b>          | <b>0</b>    | <b>0</b>    | <b>0</b>    | <b>0</b>    | <b>0</b>    | <b>0.2</b>  | <b>0</b>    | <b>0</b>    | <b>0</b>    | <b>0.2</b>  | <b>0</b>    |
| <i>p</i> -coumaric acid      | -                 | -           | -           | -           | -           | -           | 0.2         | -           | -           | -           | -           | -           |
| <b><i>Diterpenes</i></b>     | <b>47.1</b>       | <b>14.5</b> | <b>39</b>   | <b>21.8</b> | <b>44.7</b> | <b>32.4</b> | <b>31.9</b> | <b>37.5</b> | <b>27.1</b> | <b>34.1</b> | <b>23.3</b> | <b>29.2</b> |
| Kaurenal                     | 2.2               | 0.6         | 1.4         | 0.7         | 1.1         | 1.0         | 1.0         | 1.2         | 0.8         | 1.2         | 0.7         | 1.0         |
| Kaurenol                     | 4.3               | 1.2         | 2.9         | 1.2         | 2.6         | 2.1         | 2.0         | 2.8         | 1.7         | 2.6         | 1.4         | 1.9         |
| Kaurenoic acid               | 32.6              | 9.1         | 26.3        | 14.9        | 27.4        | 22.1        | 21.8        | 25.6        | 18.5        | 23.3        | 16.4        | 20.0        |
| Hydroxukaurenoic acid        | 1.9               | 0.9         | 1.9         | 1.2         | 2.5         | 1.8         | 1.8         | 1.7         | 1.5         | 1.7         | 1.2         | 1.7         |
| Acetoxykaurenoic acid        | 6.1               | 2.7         | 6.5         | 3.8         | 11.1        | 5.4         | 5.2         | 6.2         | 4.6         | 5.3         | 3.6         | 4.6         |
| <b><i>Cardanols</i></b>      | <b>0.3</b>        | <b>3.6</b>  | <b>1.8</b>  | <b>2.1</b>  | <b>1.6</b>  | <b>2.1</b>  | <b>1.8</b>  | <b>1.4</b>  | <b>2.2</b>  | -           | -           | -           |
| Cardanol C17:2               | Tr.               | 0.8         | 0.6         | 0.4         | 0.5         | 0.7         | 0.6         | 0.6         | 0.4         | 0.3         | 0.3         | 0.6         |
| Cardanol C17:1               | Tr.               | 0.7         | 0.2         | 0.5         | 0.6         | -           | 0.6         | 0.4         | 0.6         | 0.6         | 0.5         | 0.7         |
| Cardanol C19:1               | -                 | -           | -           | -           | -           | -           | -           | 0.2         | 0.2         | -           | -           | 0.2         |
| Cardanol C19:1 (isomer)      | 0.3               | 2.1         | 1.0         | 1.2         | 0.5         | 1.4         | 0.6         | 0.5         | 1.0         | 0.6         | 0.8         | 1.1         |
| <b><i>Cardols</i></b>        | <b>1.4</b>        | <b>11.5</b> | <b>3.6</b>  | <b>9.9</b>  | <b>1.5</b>  | <b>5.4</b>  | <b>3.6</b>  | <b>2.6</b>  | <b>6</b>    | <b>2.7</b>  | <b>5.1</b>  | <b>6</b>    |
| Cardol C15:1                 | -                 | 0.5         | Tr.         | 0.3         | -           | 0.2         | Tr.         | 0.2         | 0.5         | 0.1         | 0.2         | 0.2         |
| Cardol C15:0                 | -                 | 1.0         | 0.3         | 0.7         | -           | 0.4         | 0.2         | 0.2         | -           | 0.2         | 0.4         | 0.5         |
| Cardol C17:2                 | 0.6               | 4.4         | 1.7         | 4.5         | 0.8         | 2.2         | 1.7         | 1.0         | 3.0         | 1.1         | 2.2         | 2.3         |
| Cardol C17:1                 | 0.2               | 1.1         | 0.3         | 0.7         | 0.3         | 0.4         | 0.4         | 0.3         | 0.5         | -           | 0.4         | 0.5         |
| Cardol C17:1 (isomer)        | 0.2               | 1.0         | 0.3         | 0.6         | 0.2         | 0.4         | 0.4         | 0.2         | 1.4         | 0.3         | 0.4         | 0.6         |
| Cardol C17:1 (isomer)        | 0.4               | 3.3         | 1.0         | 3.0         | 0.5         | 1.8         | 0.9         | 0.7         | 0.6         | 0.2         | 1.5         | 1.9         |
| Cardol C17:0                 | Tr.               | 0.2         | Tr.         | 0.1         | Tr.         | Tr.         | Tr.         | Tr.         | Tr.         | 0.8         | Tr.         | Tr.         |

|                                                 |             |             |             |             |             |             |             |             |             |             |             |             |
|-------------------------------------------------|-------------|-------------|-------------|-------------|-------------|-------------|-------------|-------------|-------------|-------------|-------------|-------------|
| <b>Anacardic acids</b>                          | <b>Tr.</b>  | <b>5.1</b>  | <b>1.5</b>  | <b>2.4</b>  | <b>0.4</b>  | <b>2.3</b>  | <b>1.2</b>  | <b>0.8</b>  | <b>2.2</b>  | <b>1.6</b>  | <b>2.0</b>  | <b>1.4</b>  |
| Anacardic acid C15:2                            | Tr.         | 1.9         | 0.9         | 1.4         | 0.2         | 0.9         | 0.4         | 0.4         | 1.2         | 0.6         | 0.8         | 0.5         |
| Anacardic acid C15:1                            | Tr.         | 1.6         | 0.6         | Tr.         | 0.1         | 0.8         | 0.6         | 0.3         | 0.8         | 0.6         | 0.7         | 0.5         |
| Anacardic acid C17:1                            | -           | 1.3         | -           | 1.0         | 0.1         | 0.6         | 0.2         | 0.1         | 0.2         | 0.4         | 0.5         | 0.4         |
| Anacardic acid C15:0                            | -           | 0.3         | -           | -           | -           | -           | -           | -           | -           | -           | -           | -           |
| <b>Lignans</b>                                  | <b>16.2</b> | <b>7.8</b>  | <b>19.8</b> | <b>11.6</b> | <b>15.5</b> | <b>17.1</b> | <b>18.5</b> | <b>21.2</b> | <b>16.4</b> | <b>19.3</b> | <b>13.2</b> | <b>17.3</b> |
| Dihydrocubebin                                  | 15.4        | 7.1         | 18.5        | 10.9        | 23.2        | 16.0        | 17.4        | 19.7        | 15.3        | 18.0        | 12.4        | 16.3        |
| 3,4-Methylenedioxy<br>secoisolariciresinol      | 0.8         | 0.7         | 1.3         | 0.7         | 2.3         | 1.1         | 1.1         | 1.5         | 1.1         | 1.3         | 0.8         | 1.0         |
| <b>Triterpenes<br/>ursane/oleanane<br/>type</b> | <b>5.1</b>  | <b>8.7</b>  | <b>3.3</b>  | <b>9.4</b>  | <b>2.3</b>  | <b>7.7</b>  | <b>7.9</b>  | <b>5.2</b>  | <b>8.4</b>  | <b>6.2</b>  | <b>10.9</b> | <b>7.8</b>  |
| $\beta$ -Amyrenone                              | 0.5         | 0.6         | 0.4         | 0.9         | 0.2         | 0.7         | 0.8         | 0.5         | 0.2         | 0.7         | 0.7         | 0.8         |
| $\beta$ -Amyrin                                 | 0.8         | 3.2         | 1.3         | 3.3         | 0.6         | 2.0         | 2.2         | 1.3         | 2.4         | 2.2         | 3.0         | 2.8         |
| $\alpha$ -Amyrenone                             | 1.1         | 1.0         | 0.6         | 1.2         | 0.4         | 1.3         | 0.9         | 0.6         | 1.0         | 0.8         | 1.0         | 0.9         |
| $\alpha$ -Amyrin                                | 2.1         | 3.5         | 1.0         | 4.0         | 0.6         | 2.4         | 2.0         | 1.2         | 2.6         | 1.6         | 3.6         | 3.0         |
| Amyrin acetate                                  | 0.6         | 0.4         | -           | -           | 0.5         | 1.3         | 2.0         | 1.6         | 2.2         | 0.9         | 2.6         | 0.3         |
| <b>Triterpenes<br/>cycloartane type</b>         | <b>3.6</b>  | <b>15.1</b> | <b>5.0</b>  | <b>9.3</b>  | <b>2.1</b>  | <b>7.1</b>  | <b>6.8</b>  | <b>4.6</b>  | <b>8.5</b>  | <b>4.8</b>  | <b>8.9</b>  | <b>9.6</b>  |
| Cycloartenol                                    | 2.6         | 5.1         | 2.3         | 5.8         | 0.9         | 3.4         | 3.7         | 2.8         | 4.1         | 3.2         | 4.8         | 5.1         |
| Mangiferolic acid                               | 0.4         | 3.8         | 1.1         | 0.8         | 0.5         | 1.4         | 2.0         | 0.6         | 1.6         | 1.6         | 1.4         | 1.6         |
| Isomaniferolic acid                             | 0.6         | 6.2         | 1.6         | 2.7         | 0.7         | 2.3         | 1.1         | 1.0         | 2.8         | -           | 2.7         | 2.9         |
| <b>Others</b>                                   |             |             |             |             |             |             |             |             |             |             |             |             |
| Ethylamine                                      | 1.0         | 0.1         | 1.2         | 1.0         | 1.1         | 1.2         | 1.3         | 1.2         | 1.1         | 1.2         | 1.2         | 1.1         |
| Quinic acid                                     | Tr.         | 0.3         | 0.8         | 0.3         | 1.1         | 0.5         | 0.7         | 0.6         | 0.5         | 0.7         | 0.5         | 0.7         |
| Quinic acid (isomer)                            | 0.8         | 0.4         | 1.1         | 0.6         | 1.5         | 1.0         | 1.0         | 0.9         | 0.8         | 1.1         | 0.7         | 1.0         |

Tr. – traces (< 0.1);

Table S4. DPPH and FRAP for propolis of *Scaptotrigona mexicana*<sup>a</sup>

| Sample          | DPPH (%RSA)      | FRAP ( $\mu\text{mol Fe}^{2+}/\text{L}$ ) |
|-----------------|------------------|-------------------------------------------|
| Mp1             | 7.16 $\pm$ 0.01  | 178 $\pm$ 4                               |
| Mp2             | 5.37 $\pm$ 0.19  | 165 $\pm$ 9                               |
| Mp3             | 5.34 $\pm$ 0.27  | 148 $\pm$ 1                               |
| Mp4             | 4.35 $\pm$ 0.46  | 173 $\pm$ 1                               |
| Mp5             | 1.76 $\pm$ 0.18  | 189 $\pm$ 9                               |
| Mp6             | 2.05 $\pm$ 0.19  | 171 $\pm$ 8                               |
| Mp7             | 4.66 $\pm$ 0.11  | 172 $\pm$ 11                              |
| Mp8             | 5.65 $\pm$ 0.17  | 212 $\pm$ 10                              |
| Mp9             | 8.50 $\pm$ 0.29  | 281 $\pm$ 6                               |
| Mp10            | 3.98 $\pm$ 0.15  | 186 $\pm$ 4                               |
| Mp11            | 15.34 $\pm$ 0.28 | 149 $\pm$ 3                               |
| Mp12            | 13.27 $\pm$ 0.07 | 109 $\pm$ 5                               |
| Mp13            | 17.69 $\pm$ 0.07 | 345 $\pm$ 9                               |
| Mp14            | 17.14 $\pm$ 0.10 | 248 $\pm$ 4                               |
| Mp15            | 17.47 $\pm$ 0.17 | 334 $\pm$ 11                              |
| Mp16            | 8.16 $\pm$ 0.09  | 275 $\pm$ 14                              |
| Mp17            | 8.80 $\pm$ 0.11  | 337 $\pm$ 3                               |
| Mp18            | 6.97 $\pm$ 0.09  | 265 $\pm$ 9                               |
| Mp19            | 6.36 $\pm$ 0.26  | 247 $\pm$ 4                               |
| Mp20            | 7.06 $\pm$ 0.11  | 300 $\pm$ 9                               |
| Mp21            | 7.69 $\pm$ 0.33  | 292 $\pm$ 41                              |
| Mp22            | 7.72 $\pm$ 0.19  | 289 $\pm$ 3                               |
| Mp23            | 6.87 $\pm$ 0.24  | 279 $\pm$ 2                               |
| Mp24            | 7.02 $\pm$ 0.33  | 303 $\pm$ 5                               |
| BG <sup>b</sup> | 17.01 $\pm$ 0.21 | 411 $\pm$ 1                               |

<sup>a</sup> Tested concentration 1.0 mg/mL.

<sup>b</sup> Bulgarian *Apis mellifera* propolis. tested concentration 0.1 mg/mL.
